# Supplementary material
Source: PubMed Central journal article supplement (PMC9547893)
Supplement: NIHMS1833606-supplement-1.pdf [file NIHMS1833606-supplement-1.pdf]

601 Supporting Information

602 **Electrochemical Sensors based on MoS<sub>x</sub>-functionalized Laser Induced Graphene for Real-**  
603 **time Monitoring of Phenazines produced by *Pseudomonas aeruginosa***  
604

605 **Keren Zhou<sup>1,2</sup>, Vinay Kammarchedu<sup>1,2</sup>, Derrick Butler<sup>1,2</sup>, Pouya Soltan Khamsi<sup>1,2</sup>, and**  
606 **Aida Ebrahimi<sup>1,2,3,\*</sup>**

- 607 1. School of Electrical Engineering and Computer Science, The Pennsylvania State  
608 University, University Park, PA 16802, USA  
609 2. Materials Research Institute, The Pennsylvania State University, University Park, PA  
610 16802, USA  
611 3. Department of Biomedical Engineering, The Pennsylvania State University, University  
612 Park, PA 16802, USA

613 \*Correspondence: [sue66@psu.edu](mailto:sue66@psu.edu)

614

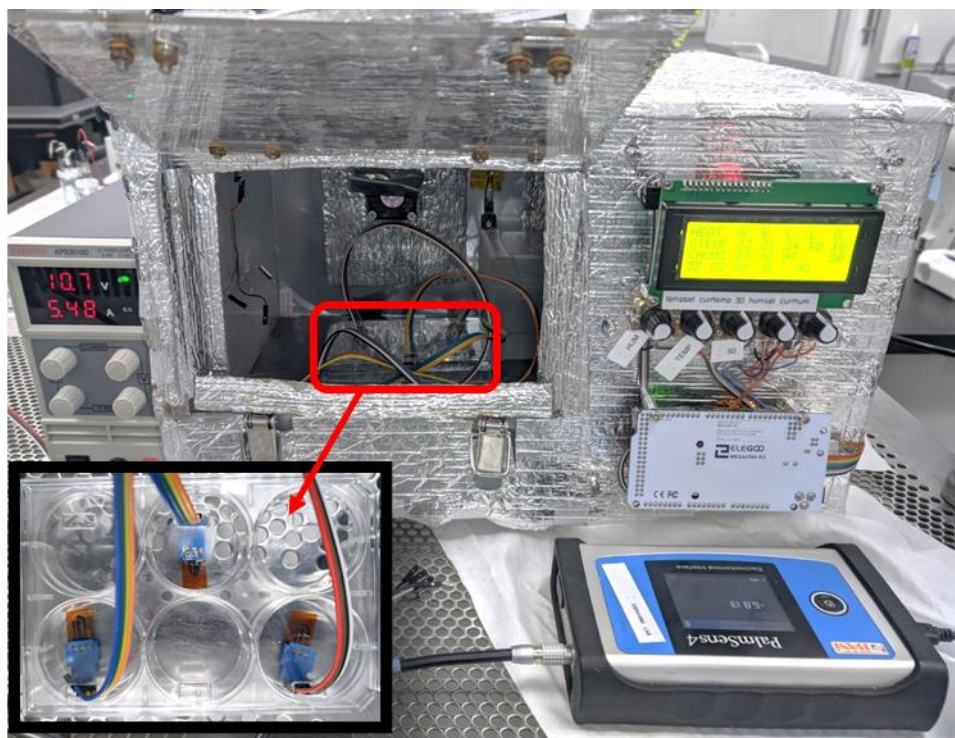

**Figure S1.** A picture of the biofilm test setup, including a custom-made humidity chamber, the connectors, cables, and a portable potentiostat. The inset shows three sensors.

615

616

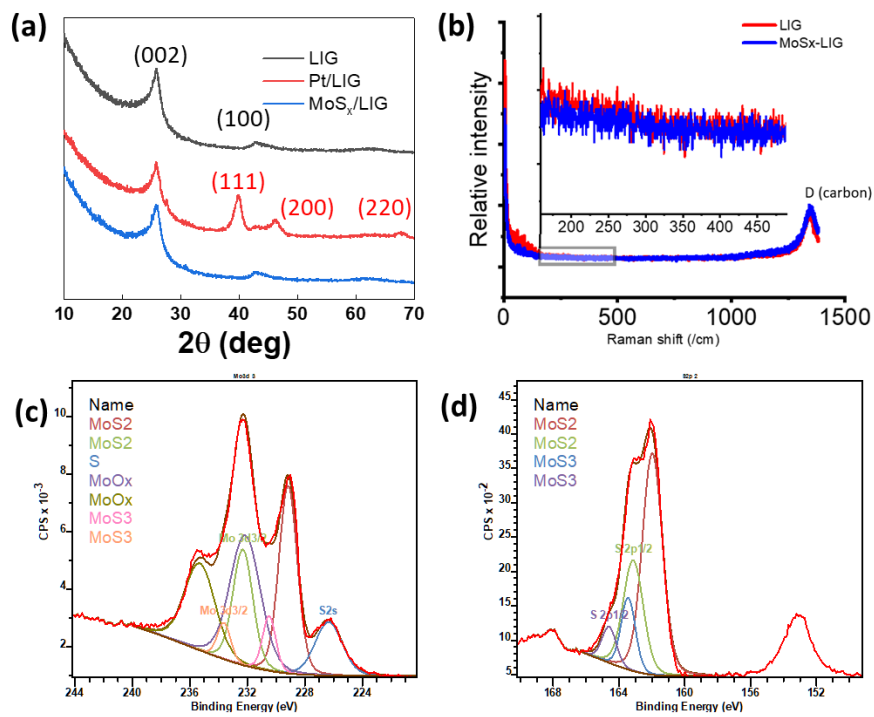

**Figure S2** (a) The XRD analysis of LIG, Pt/LIG and MoS<sub>x</sub>/LIG. (b) Raman spectrum of MoS<sub>x</sub>/LIG. High-resolution XPS spectra of (c) Mo 3d and (d) S 2p with curve fitting.

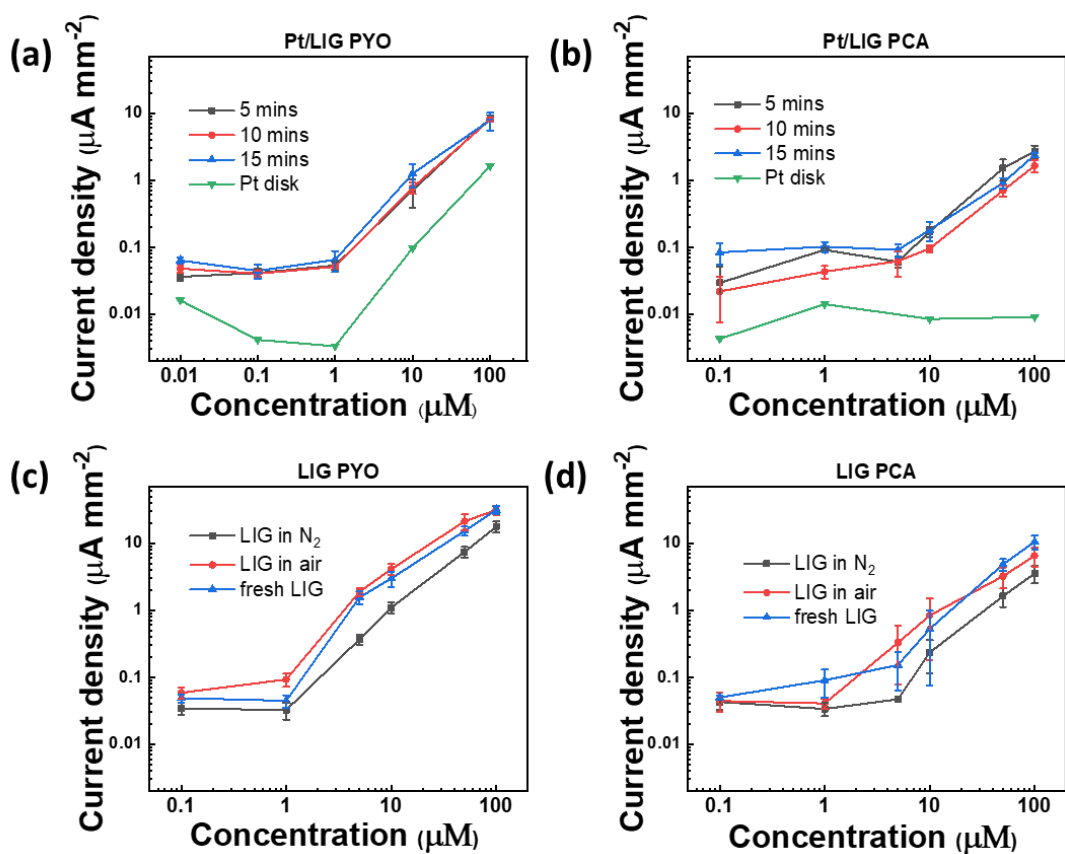

**Figure S3.** The calibration curves of Pt/LIG with 0.1~100  $\mu\text{M}$  PYO (a) and (b) PCA in BHI. Effect of Pt deposition time is studied. Comparison with Pt disk (diameter 1mm) is shown. The calibration curves of LIG with 0.1~100  $\mu\text{M}$  PYO (c) and (d) PCA in BHI, extracted from peak analysis of the SWV data. Effect of LIG storage (air vs. nitrogen environment; 3 days) compared to freshly printed LIG is studied, showing high stability of LIG electrodes.

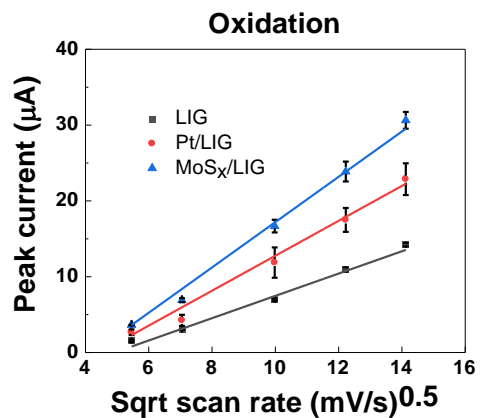

**Figure S4.** The peak current values extracted from the CV data vs. square root of the scan rate for LIG, Pt/LIG and MoS<sub>x</sub>/LIG. This data is used to calculate the electrochemically active surface area (ECSA). The lines show the linear fit to the experimental data.

618

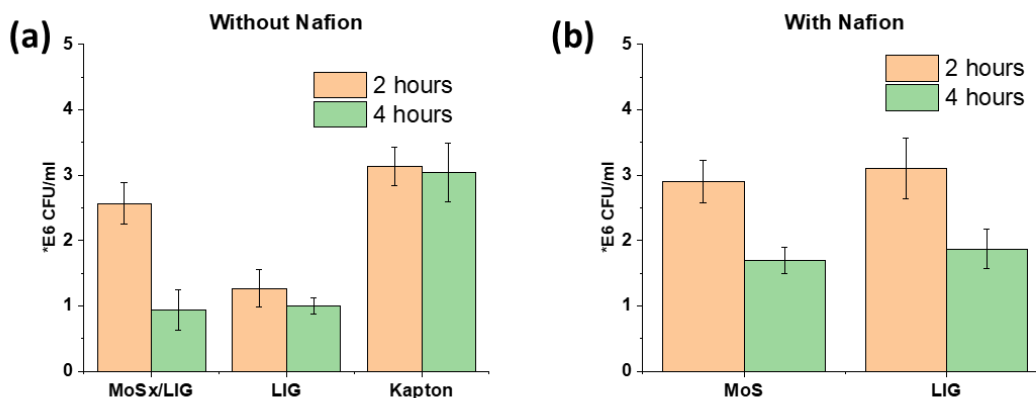

**Figure S5.** Studying viability of bacteria (*E. coli*) on LIG and MoS<sub>x</sub>/LIG surface compared to Kapton sheet (control) after 2 hours and 4 hours before (a) and after (b) coating with Nafion.

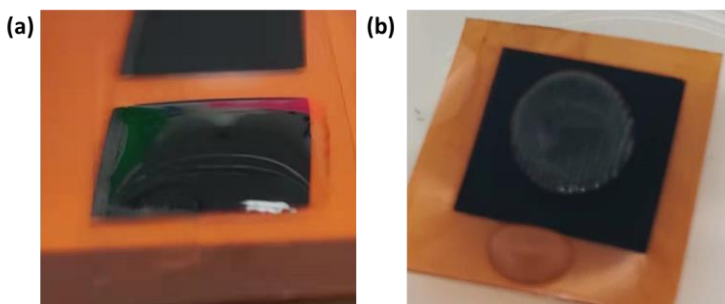

**Figure S6.** The image of LIG before coating with Nafion (a) and after Nafion coating (b) with 20uL of bacterial suspension. Surface hydrophobicity increases with addition of Nafion.

619

620

621

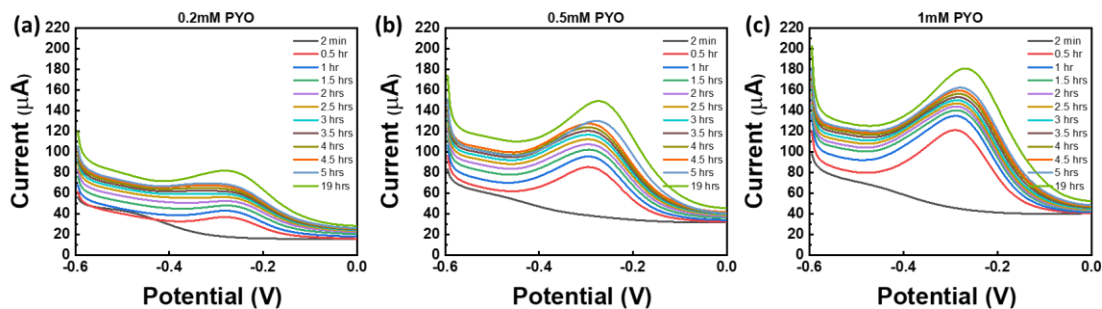

**Figure S7.** The SWV plots of the Pt/LIG with 5ul of (a) 0.2 mM PYO, (b) 0.5 mM PYO and (c) 1 mM PYO on thin agar layer over time.

622

623

624

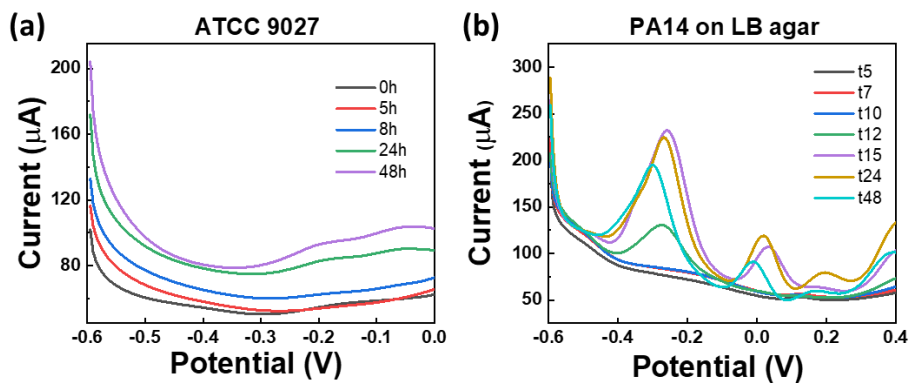

**Figure S8.** The SWV curves with LB agar as the medium with (a) PA strain ATCC 9027 and (b) PA14 strain over time. The other test conditions (SWV waveform, agar thickness, etc.) are same as the “normal” test configuration described in the main text.
